# Supplementary material for: Lentivector Iterations and Pre-Clinical Scale-Up/Toxicity Testing: Targeting Mobilized CD34+ Cells for Correction of Fabry Disease
Source: PubMed Central journal article supplement — Mol Ther Methods Clin Dev. 2017 May 12;5:241–58. doi: 10.1016/j.omtm.2017.05.003 (PMC5453867; doi:10.1016/j.omtm.2017.05.003), 2017-05-12
Supplement: mmc1.pdf [file mmc1.pdf]

## **Supplemental Information**

### **Lentivector Iterations and Pre-Clinical**

### **Scale-Up/Toxicity Testing: Targeting Mobilized**

### **CD34<sup>+</sup> Cells for Correction of Fabry Disease**

**Ju Huang, Aneal Khan, Bryan C. Au, Dwayne L. Barber, Lucía López-Vásquez, Nicole L. Prokopishyn, Michel Boutin, Michael Rothe, Jack W. Rip, Mona Abaoui, Murtaza S. Nagree, Shaalee Dworski, Axel Schambach, Armand Keating, Michael L. West, John Klassen, Patricia V. Turner, Sandra Sirrs, C. Anthony Rupar, Christiane Auray-Blais, Ronan Foley, and Jeffrey A. Medin**

## SUPPLEMENTARY MATERIAL

**Table S1. Sequencing results of LV/FAB integration sites in IVIM study.**

| Sequence # | Clone # | Vector | c.MOI     | Gene Symbol | EntrezGene | Chromosome | Distance to gene | TSS distance |
|------------|---------|--------|-----------|-------------|------------|------------|------------------|--------------|
| 3          | 3       | FAB    | <b>60</b> | Pde7b       | 29863      | 10         | intronic         | 13070        |
| 14         | 5       | FAB    | <b>60</b> | Hey1        | 15213      | 3          | -67574           | -67716       |
| 17         | 5       | FAB    | <b>60</b> | Hey1        | 15213      | 3          | -67552           | -67583       |
| 18         | 4       | FAB    | <b>60</b> | Ahi1        | 52906      | 10         | intronic         | 16678        |

**Table S2. Biochemical parameters of NSF mice transplanted with mock or LV/AGA-transduced Fabry patient CD34<sup>+</sup> cells.**

| <b>Mice group</b>            | <b>Mock group</b> |                | <b>LV/AGA group</b> |               |
|------------------------------|-------------------|----------------|---------------------|---------------|
| <b>Time after transplant</b> | <b>Day 7</b>      | <b>Day 28</b>  | <b>Day 7</b>        | <b>Day 28</b> |
| <b>ALT (IU/L)</b>            | 75.4 ± 29.66      | 91.6 ± 54.68   | 71.1 ± 62.83        | 59.4 ± 23.06  |
| <b>AST (IU/L)</b>            | 270.0 ± 166.63    | 193.8 ± 106.91 | 170.5 ± 68.41       | 184.6 ± 78.00 |
| <b>ALP (IU/L)</b>            | 46.7 ± 6.72       | 62.8 ± 12.90   | 47.2 ± 8.28         | 59.2 ± 9.69   |
| <b>TBIL (mg/dL)</b>          | 0.20 ± 0.01       | 0.16 ± 0.05    | 0.16 ± 0.04         | 0.19 ± 0.05   |
| <b>TP (g/L)</b>              | 45.8 ± 0.98       | 49.2 ± 0.94    | 48.4 ± 1.67         | 49.5 ± 1.67   |
| <b>ALB (g/L)</b>             | 25.4 ± 1.53       | 27.1 ± 1.39    | 27.3 ± 1.34         | 27.4 ± 0.46   |
| <b>CHOL (mg/dL)</b>          | 74.4 ± 8.29       | 101.2 ± 15.83  | 84.0 ± 13.51        | 98.9 ± 19.17  |
| <b>HDL (mg/dL)</b>           | 35.7 ± 5.24       | 50.6 ± 11.34   | 41.2 ± 7.10         | 50.1 ± 10.35  |
| <b>TRIG (mg/dL)</b>          | 93.7 ± 21.34      | 121.0 ± 78.78  | 164.7 ± 65.16       | 135.7 ± 49.84 |
| <b>PHOS (mg/dL)</b>          | 8.2 ± 0.76        | 7.6 ± 0.77     | 7.7 ± 0.55          | 7.3 ± 0.53    |
| <b>CAL (mg/dL)</b>           | 9.8 ± 0.27        | 10.1 ± 0.22    | 9.9 ± 0.15          | 10.0 ± 0.27   |
| <b>GLU (mg/dL)</b>           | 178.2 ± 19.75     | 188.8 ± 18.38  | 193.8 ± 21.65       | 207.4 ± 30.73 |
| <b>CRE (mg/dL)</b>           | 0.09 ± 0.05       | 0.09 ± 0.01    | 0.10 ± 0.02         | 0.10 ± 0.02   |
| <b>BUN (mg/dL)</b>           | 35.8 ± 7.20       | 28.5 ± 4.23    | 27.1 ± 6.20         | 29.6 ± 6.00   |
| <b>Na (mmol/L)</b>           | 150.6 ± 5.65      | 151.1 ± 3.29   | 151.0 ± 3.06        | 150.2 ± 2.36  |
| <b>K (mmol/L)</b>            | 5.8 ± 0.28        | 6.3 ± 0.54     | 5.8 ± 0.47          | 6.2 ± 0.89    |
| <b>Cl (mmol/L)</b>           | 114.6 ± 4.02      | 112.73 ± 2.24  | 112.6 ± 2.69        | 113.3 ± 1.52  |

ALT, Alanine aminotransferase; AST, Aspartate aminotransferase; ALP, Alkaline phosphatase; TBIL, Total bilirubin; TP, Total protein; ALB, Albumin; CHOL, Total cholesterol; HDL, HDL Cholesterol; TRIG, Triglycerides; PHOS, Phosphorus; CAL, Calcium; GLU, Glucose; CRE, Creatinine; BUN, Blood urea nitrogen; Na, Sodium; K, Potassium; Cl, Chloride

**Table S3. Hematological parameters of NSF mice transplanted with mock or LV/AGA-transduced Fabry patient CD34<sup>+</sup> hematopoietic cells at day 7 post-transplant.**

| Mice group                       | Mock group               |                                 | Fabry group              |                               |
|----------------------------------|--------------------------|---------------------------------|--------------------------|-------------------------------|
| Time after transplant            | Day 0                    | Day 7                           | Day 0                    | Day 7                         |
| <b>RBC</b> (10 <sup>12</sup> /L) | 8.9 ± 0.26               | 6.7 ± 0.21                      | 9.0 ± 0.14               | 6.9 ± 0.42                    |
| <b>Hgb</b> (g/L)                 | 147 ± 6.78               | 103.8 ± 2.95                    | 149.3 ± 6.19             | 107.7 ± 6.88                  |
| <b>HCT</b> (L/L)                 | 0.54 ± 0.01              | 0.39 ± 0.01                     | 0.54 ± 0.01              | 0.40 ± 0.03                   |
| <b>MCV</b> (fL)                  | 60.8 ± 0.69              | 57.5 ± 0.99                     | 60.4 ± 0.68              | 58.7 ± 0.94                   |
| <b>MCH</b> (pg/cell)             | 16.4 ± 0.46              | 15.5 ± 0.29                     | 16.6 ± 0.68              | 15.7 ± 0.50                   |
| <b>MCHC</b> (g/L)                | 270.2 ± 9.86             | 268.4 ± 1.82                    | 274.6 ± 12.77            | 267.3 ± 5.97                  |
| <b>PLT</b> (10 <sup>9</sup> /L)  | 1050 ± 55.5 <sup>a</sup> | <b>130.4 ± 27.2<sup>b</sup></b> | 963 ± 192.2 <sup>c</sup> | <b>206 ± 36.8<sup>b</sup></b> |
| <b>WBC</b> (10 <sup>9</sup> /L)  | 2.3 ± 1.03               | 0.4 ± 0.11                      | 2.2 ± 0.77               | 0.5 ± 0.22                    |
| <b>MPV</b> (fL)                  | 4.4 ± 0.14               | 5.9 ± 0.55                      | 4.4 ± 0.15               | 5.9 ± 0.40                    |
| <b>RDW</b> (%)                   | 17.6 ± 0.58              | 16.4 ± 0.57                     | 17.6 ± 0.60              | 17.2 ± 0.59                   |
| <b>NE</b> (10 <sup>9</sup> /L)   | 1.37 ± 0.53              | 0.14 ± 0.08                     | 1.47 ± 0.59              | 0.12 ± 0.08                   |
| <b>LY</b> (10 <sup>9</sup> /L)   | 0.59 ± 0.26              | 0.22 ± 0.05                     | 0.48 ± 0.09              | 0.26 ± 0.10                   |
| <b>MO</b> (10 <sup>9</sup> /L)   | 0.28 ± 0.25              | 0.08 ± 0.02                     | 0.13 ± 0.04              | 0.08 ± 0.04                   |
| <b>BA</b> (10 <sup>9</sup> /L)   | 0.02 ± 0.02              | 0.00                            | 0.04 ± 0.06              | 0.00                          |
| <b>EO</b> (10 <sup>9</sup> /L)   | 0.07 ± 0.07              | 0.00                            | 0.10 ± 0.09              | 0.00                          |

RBC, red blood cells; Hgb, hemoglobin; Hct, hematocrit; MCV, mean corpuscle volume; MCH, mean corpuscular hemoglobin; MCHC, mean corpuscular hemoglobin concentration; RDW, red cell distribution width; PLT, platelets; WBC, white blood cells; MPV, mean platelet volume; NE, neutrophils; LY, lymphocytes; MO, monocytes; BA, basophils; EO, eosinophils

<sup>a</sup>, one sample excluded due to hemolysis; <sup>b</sup>, significant different between Mock and LV/AGA group; <sup>c</sup>, one sample excluded due to hemolysis

**Table S4. Hematological parameters of NSF mice transplanted with mock or LV/AGA-transduced Fabry patient CD34<sup>+</sup> hematopoietic cells at day 28 post-transplant.**

| Mice group                       | Mock group                 |                                | Fabry group                 |                                |
|----------------------------------|----------------------------|--------------------------------|-----------------------------|--------------------------------|
|                                  | Day 0                      | Day 28                         | Day 0                       | Day 28                         |
| <b>RBC</b> (10 <sup>12</sup> /L) | 8.8 ± 0.27 <sup>a</sup>    | 9.1 ± 0.30                     | 9.1 ± 0.30                  | 7.9 ± 0.24                     |
| <b>Hgb</b> (g/L)                 | 141.8 ± 5.04               | 133.8 ± 8.57                   | 147.3 ± 7.98                | 130.6 ± 5.93                   |
| <b>HCT</b> (L/L)                 | 0.54 ± 0.02                | 0.54 ± 0.04                    | 0.56 ± 0.02                 | 0.51 ± 0.02                    |
| <b>MCV</b> (fL)                  | 60.7 ± 0.74                | 65.4 ± 1.54                    | 61.2 ± 0.78                 | 64.4 ± 1.18                    |
| <b>MCH</b> (pg/cell)             | 16.0 ± 0.19                | 16.3 ± 0.75                    | 16.2 ± 0.54                 | 16.5 ± 0.45                    |
| <b>MCHC</b> (g/L)                | 263.3 ± 5.05               | 249.8 ± 8.84                   | 264.4 ± 9.35                | 255.6 ± 5.90                   |
| <b>RDW</b> (%)                   | 17.7 ± 0.18                | 21.2 ± 1.77                    | 17.9 ± 0.35                 | 20.9 ± 1.09                    |
| <b>PLT</b> (10 <sup>9</sup> /L)  | 976.5 ± 60.15 <sup>b</sup> | 622.5 ± 120.45                 | 915.0 ± 188.64 <sup>c</sup> | 651.0 ± 141.97                 |
| <b>WBC</b> (10 <sup>9</sup> /L)  | 2.0 ± 0.52                 | 0.8 ± 0.21                     | 2.2 ± 0.75                  | 1.4 ± 0.63                     |
| <b>MPV</b> (fL)                  | 4.5 ± 0.23                 | 4.9 ± 0.26                     | 4.5 ± 0.27                  | 4.9 ± 0.26                     |
| <b>NE</b> (10 <sup>9</sup> /L)   | 1.26 ± 0.48                | <b>0.50 ± 0.18<sup>d</sup></b> | 1.31 ± 0.46                 | <b>0.84 ± 0.35<sup>d</sup></b> |
| <b>LY</b> (10 <sup>9</sup> /L)   | 0.50 ± 0.07                | 0.25 ± 0.03                    | 0.56 ± 0.17                 | 0.34 ± 0.16                    |
| <b>MO</b> (10 <sup>9</sup> /L)   | 0.16 ± 0.06                | 0.05 ± 0.03                    | 0.19 ± 0.10                 | 0.08 ± 0.04                    |
| <b>BA</b> (10 <sup>9</sup> /L)   | 0.01 ± 0.02                | 0.00                           | 0.05 ± 0.04                 | 0.03 ± 0.04                    |
| <b>EO</b> (10 <sup>9</sup> /L)   | 0.04 ± 0.03                | 0.02 ± 0.01                    | 0.08 ± 0.06                 | 0.08 ± 0.08                    |

<sup>a</sup>, one sample excluded due to hemolysis; <sup>b</sup>, one sample excluded due to hemolysis; <sup>c</sup>, one sample excluded due to hemolysis; <sup>d</sup>, significant different between Mock and LV/AGA group

## Supplementary Figures Legend

**Figure S1.  $\alpha$ -Gal A activity in supernatants and cell lysates of CD34<sup>+</sup> hematopoietic cells transduced with multiple LVs.** CD34<sup>+</sup> hematopoietic cells isolated from healthy donor (normal) or Fabry patient #14-159 were transduced independently with each LV preparation. After overnight transduction, cells were washed and cultured for 2 additional days to minimize pseudo-transduction effects. **(a)** Transduction efficiency in LV/FAB-transduced Fabry patient CD34<sup>+</sup> cells were determined by staining cells with a monoclonal antibody against human LNGFR (i.e. CD271) and flow cytometry analyses. Cells were also stained with an antibody against human CD34 to confirm phenotype. Cell culture was harvested, and secreted (supernatant) **(b)** and intracellular (cell lysate) **(c)**  $\alpha$ -gal A activity was measured as described in the Materials and Methods section.

**Figure S2. Sample ion chromatograms of 22 Gb<sub>3</sub> isoforms analyzed by UPLC-MS/MS from mouse spleen tissue samples.** **(a)** High abundance Gb<sub>3</sub> isoforms; **(b)** Low abundance Gb<sub>3</sub> isoforms. Cps = counts per second

**Figure S3. Platelet and neutrophil levels in NSF mice following the pre-clinical Toxicology study.** **(a)** Mice from the LV/AGA group showed significantly higher levels of platelets (PLT) than mice from the Mock group at Day 7 after transplant (Day+7). **(b)** Mice from the LV/AGA group showed significantly higher levels of neutrophils (NE) than mice from the Mock group at Day 28 after transplant (Day+28).

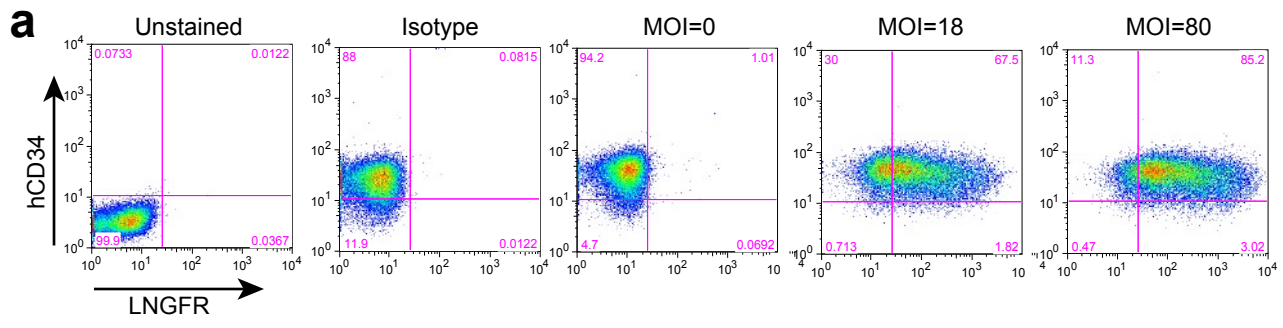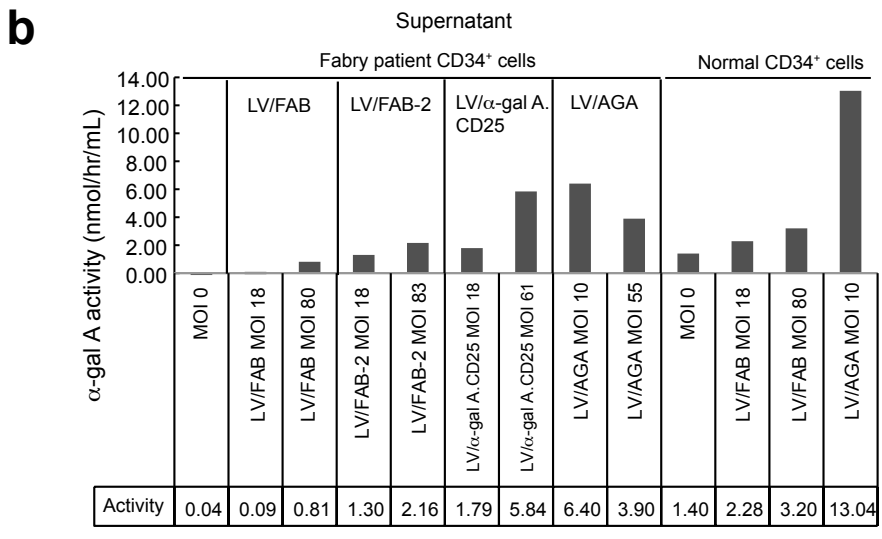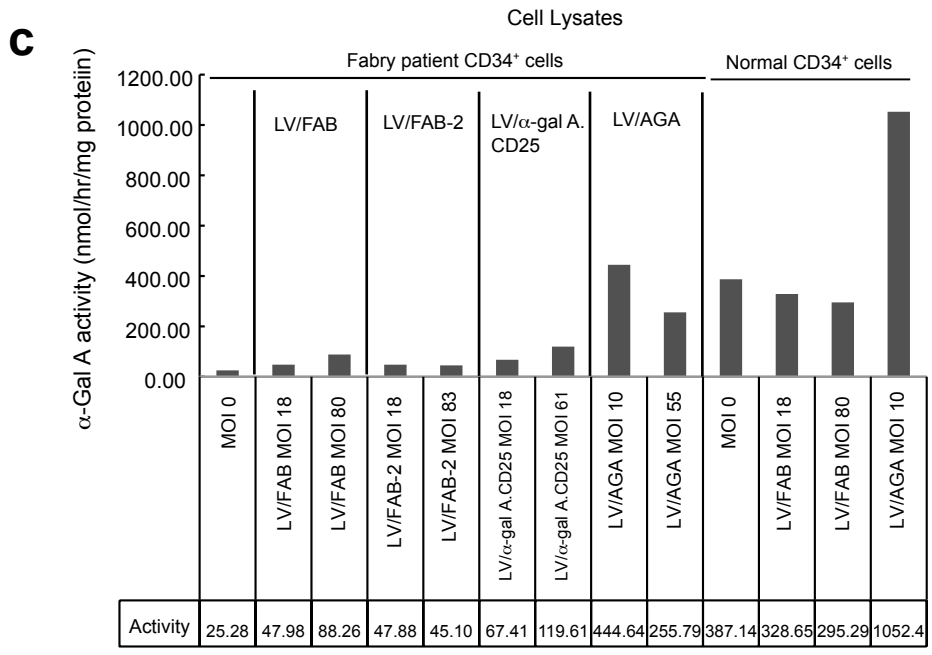

**Figure S1**

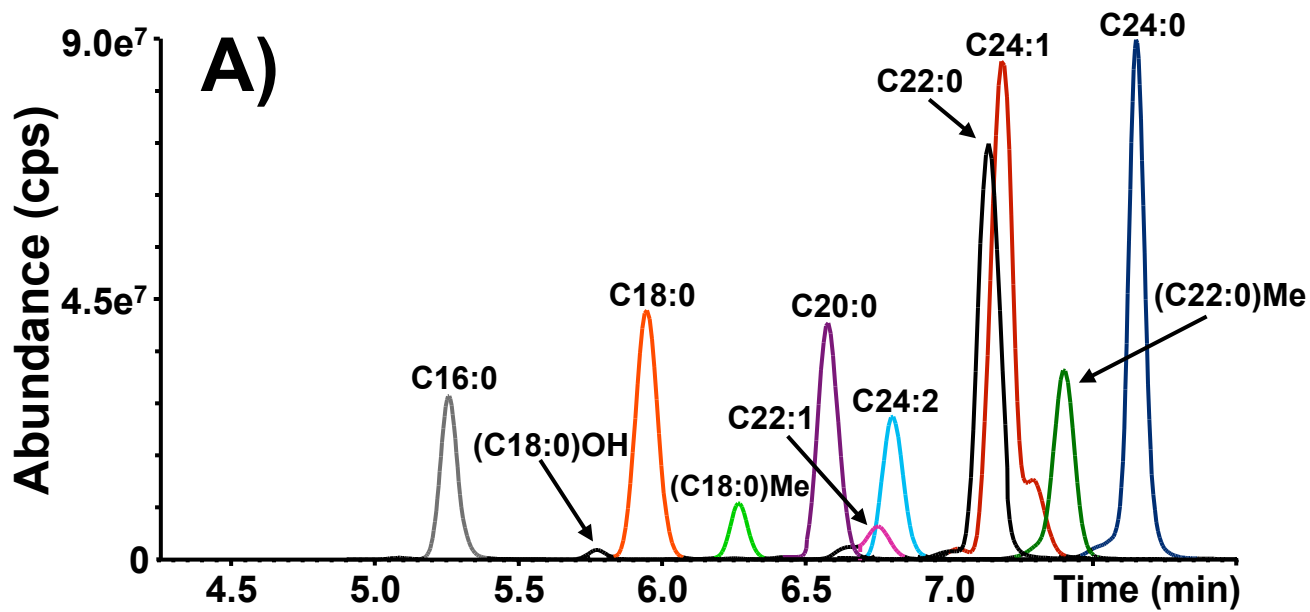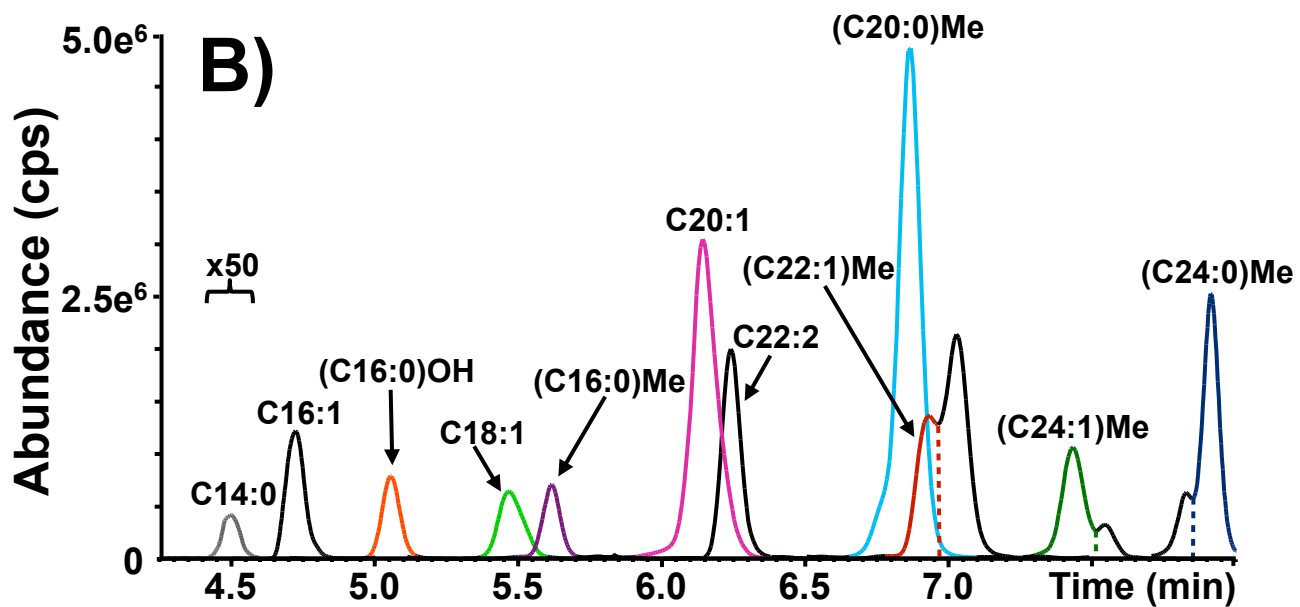

Figure S2



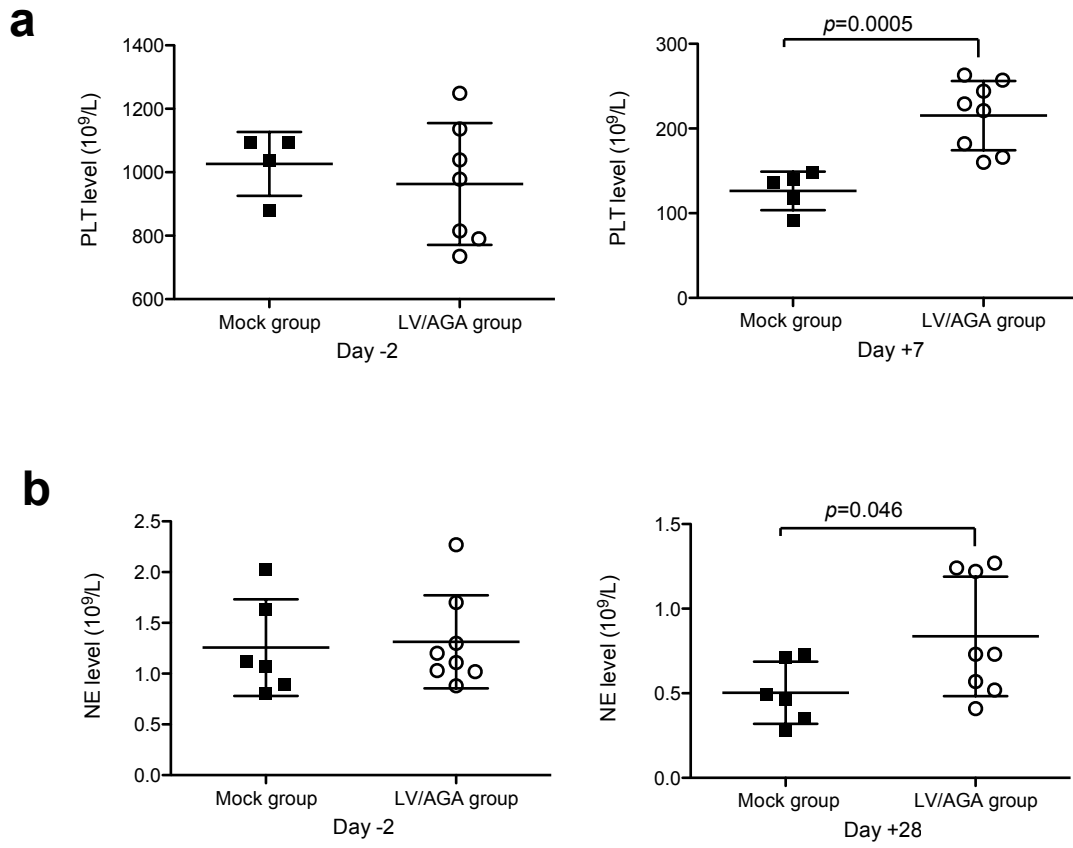

**Figure S3**
